# Supplementary material for: Novel COL9A3 mutation in a family diagnosed with multiple epiphyseal dysplasia: a case report
Source: PubMed Central journal article supplement (PMC4236474; doi:10.1186/1471-2474-15-371), 2014-11-08

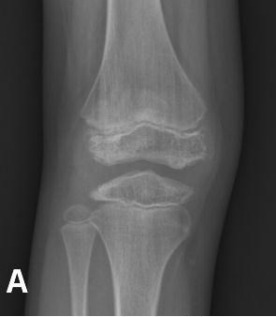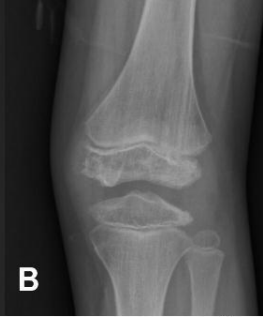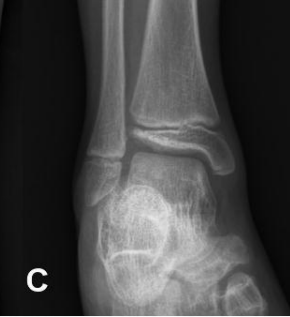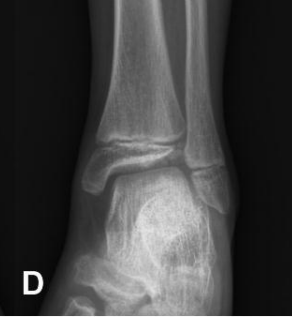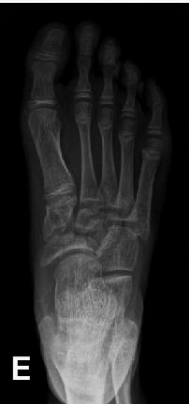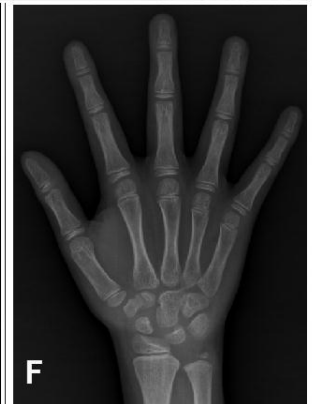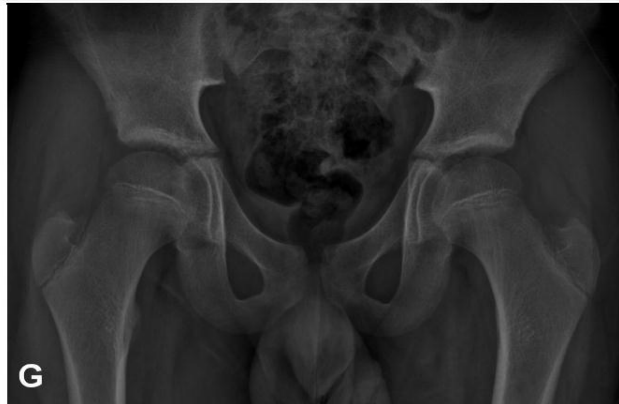

Supplement: 12891_2014_2307_MOESM1_ESM.pdf [file 12891_2014_2307_MOESM1_ESM.pdf]
